# Supplementary material for: Transcriptome Profiling to Identify Genes Involved in Mesosulfuron-Methyl Resistance in Alopecurus aequalis
Source: Front Plant Sci. 2017 Aug 9;8:1391. doi: 10.3389/fpls.2017.01391 (PMC5552757; doi:10.3389/fpls.2017.01391)
Supplement: Supplementary file 1 [file Table1.XLSX]

## Sheet: Sheet1
Supplementary Table S1. Quality assessment of the reads generated from RNA-Seq for the R (AH18) and S (SD01) Alopecurus aequalis populations
Samples	S_3_2	S_1_3	S_2_1	S_2_3	S_2_2	S_3_1	S_3_3	S_1_1	S_1_2	R_3_3	R_3_2	R_1_3	R_3_1	R_1_1	R_2_3	R_2_1	R_2_2	R_1_2
Raw Reads Number	51938568	53141352	53016412	49270938	53258586	52175482	51827398	54117550	51420316	56774946	53859522	58917072	56199502	52434960	53925198	56819206	60784678	55704666
Raw Bases Number	7790785200	7971202800	7952461800	7390640700	7988787900	7826322300	7774109700	8117632500	7713047400	8516241900	8078928300	8837560800	8429925300	7865244000	8088779700	8522880900	9117701700	8355699900
Raw Reads Length (bp)	150	150	150	150	150	150	150	150	150	150	150	150	150	150	150	150	150	150
Clean Reads Number	46476502	47269656	47398826	44254658	47289084	46694460	46442324	47712950	44335982	47270970	44333676	47490182	47067780	44739896	44685812	46652374	47044772	44686832
Clean Bases Number	6971475300	7090448400	7109823900	6638198700	7093362600	7004169000	6966348600	7156942500	6650397300	7090645500	6650051400	7123527300	7060167000	6710984400	6702871800	6997856100	7056715800	6703024800
Clean Reads Length (bp)	150	150	150	150	150	150	150	150	150	150	150	150	150	150	150	150	150	150
Clean Reads Rate (%)	89.48	88.95	89.4	89.82	88.79	89.5	89.61	88.17	86.22	83.26	82.31	80.61	83.75	85.32	82.87	82.11	77.4	80.22
Adapter Polluted Reads Number	0	0	0	0	0	0	0	0	0	374624	350086	396680	394672	398430	339908	341728	390916	427722
Adapter Polluted Reads Rate (%)	0	0	0	0	0	0	0	0	0	0.66	0.65	0.67	0.7	0.76	0.63	0.6	0.64	0.77
Ns Reads Number	9184	10850	11904	10400	9492	9370	22688	4644	5390	7166	6732	8096	7952	6722	6822	7448	7670	7452
Ns Reads Rate (%)	0.02	0.02	0.02	0.02	0.02	0.02	0.04	0.01	0.01	0.01	0.01	0.01	0.01	0.01	0.01	0.01	0.01	0.01
Low-quality Reads Number	5452880	5860844	5605680	5005878	5960008	5471650	5362384	6399954	7078942	9122184	9169026	11022112	8729096	7289910	8892654	9817654	13341318	10582658
Low-quality Reads Rate (%)	10.5	11.03	10.57	10.16	11.19	10.49	10.35	11.83	13.77	16.07	17.02	18.71	15.53	13.9	16.49	17.28	21.95	19
Raw Q30 Bases Rate (%)	92.21	92	92.22	92.39	91.92	92.22	92.01	91.57	90.67	89.79	89.4	88.73	90	90.84	89.58	89.35	87.44	88.26
Clean Q30 Bases Rate (%)	95.56	95.49	95.58	95.63	95.49	95.53	95.12	95.18	94.84	95.07	94.97	94.78	95.09	95.35	94.97	94.99	94.47	94.43
